# Supplementary material for: Cellulose-Based Hectocycle Nanopolymers: Synthesis, Molecular Docking and Adsorption of Difenoconazole from Aqueous Medium
Source: MDPI journal article supplement (doi:10.3390/ijms22116090), 2021-06-04
Supplement: s1 [file s1]

# Cellulose-Based Hectocycle Nanopolymers: Synthesis, Molecular Docking and Adsorption of Difenconazole from Aqueous Medium

Bayan Khalaf <sup>1</sup>, Othman Hamed <sup>1,\*</sup>, Shehdeh Jodeh <sup>1,\*</sup>, Roland Bol <sup>2</sup>, Ghadir Hanbali <sup>1</sup>, Zaki Safi <sup>3</sup>, Omar Dagdag <sup>4</sup>, Avni Berisha <sup>5,6</sup> and Subhi Samhan <sup>7</sup>

<sup>1</sup> Chemistry Department, Faculty of Science, An-Najah National University, P.O. Box 7, Nablus, Palestine.

<sup>2</sup> Institute of Bio and Geosciences, Agrosphere (IBG-3), Forschungszentrum Jülich GmbH, 52425 Jülich, Germany.

<sup>3</sup> Al Azhar University-Gaza, Chemistry Department, Faculty of Science, P.O. Box 1277, Gaza, Palestine

<sup>4</sup> Laboratory of Industrial Technologies and Services (LITS), Department of Process Engineering, Height School of Technology, Sidi Mohammed Ben Abdallah University, P.O. Box 2427, 30000, Fez, Morocco.

<sup>5</sup> Department of Chemistry, Faculty of Natural and Mathematics Science, University of Prishtina, 10000 Prishtina, Kosovo.

<sup>6</sup> Materials Science-Nanochemistry Research Group, NanoAlb-Unit of Albanian Nanoscience and Nanotechnology, 1000 Tirana, Albania.

<sup>7</sup> Research and Development Center, Palestine Water Authority (PWA), Ramallah, Palestine.

\* Correspondence: ohamed@najah.edu, Tel: +970-594-466-271 (O.H.); sjodeh@najah.edu, Tel: +970-594-466-271 (S.J.)

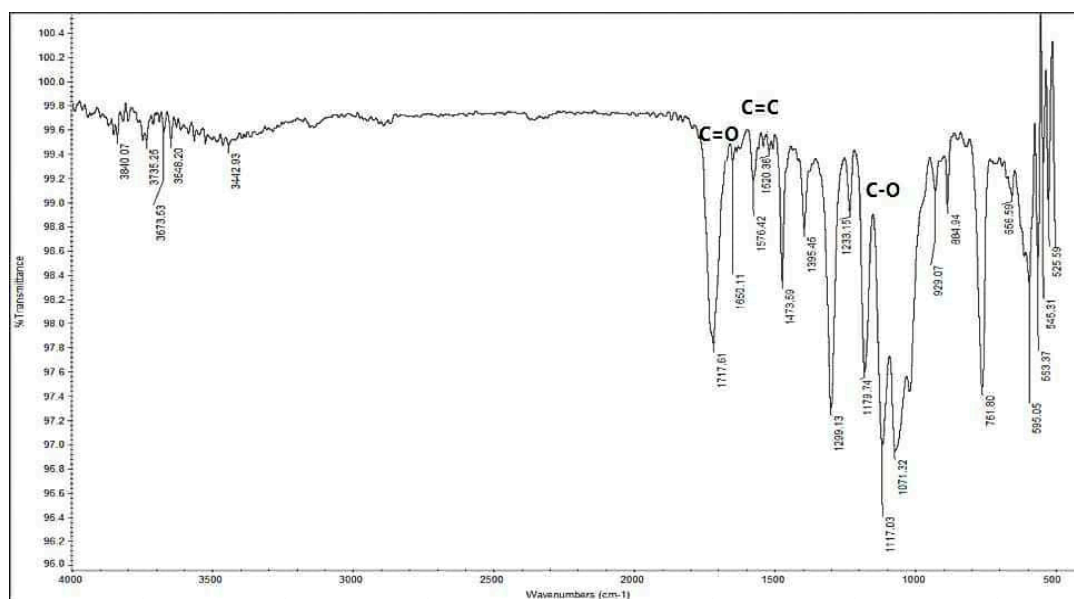

Figure S1. FT-IR analysis for Cell-D.

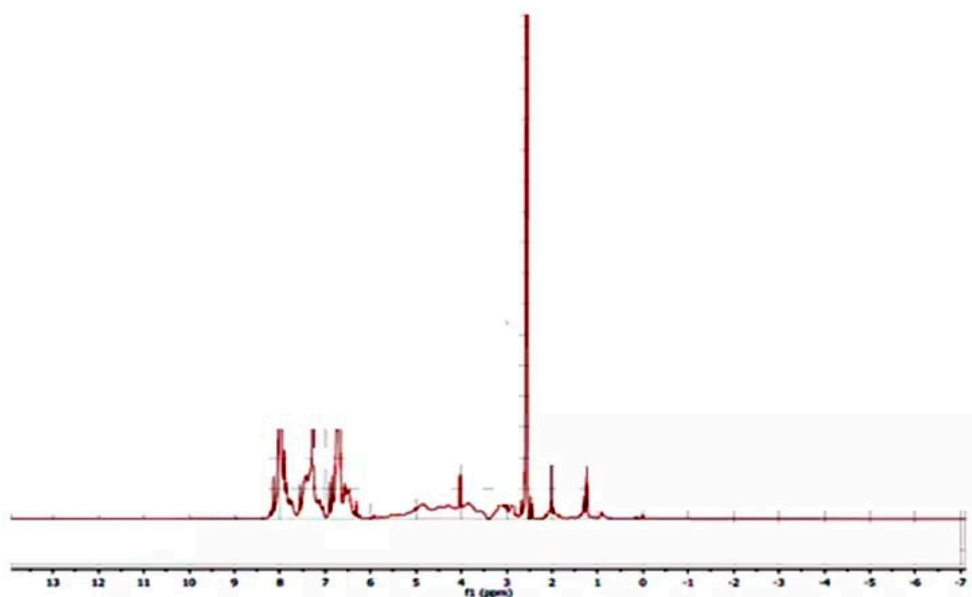

Figure S2.  $^1\text{H}$  NMR analysis for Cell-D dissolved in  $\text{DMSO-d}_6$ .

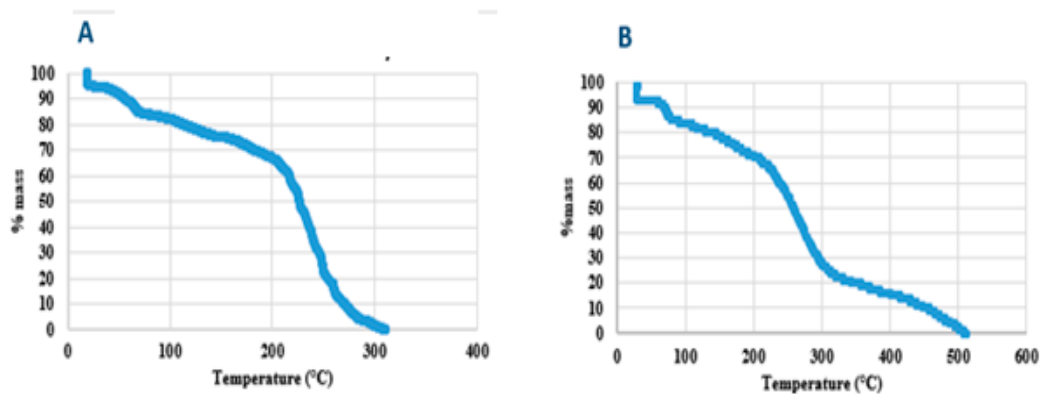

Figure S3. TGA analysis for A: Cell-D and B: Cell-X.

Table S1. Parameters of Langmuir and Freundlich isotherms for Difenconazole by Cell-X and Cell-D.

| Nanopolymer | Langmuir Isotherm |            | Freundlich Isotherm |           |
|-------------|-------------------|------------|---------------------|-----------|
|             | $Q_0$ (mg/g)      | $b$ (L/mg) | $K_F$ (mg/g)        | $n$ (g/L) |
| Cell-D      | 5.893             | 2.173      | 9.270               | -4.016    |
| Cell-X      | 5.447             | 1.708      | 9.311               | -3.618    |

**Table S2.** Pseudo-first-order, pseudo-second-order and intra-particle-diffusion kinetic adsorption parameters of Difenoconazole removal by Cell-X or Cell-D.

| Nanopolymer | Pseudo First-Order Kinetics |                                                   | $q_{exp}$<br>(mg/g) | Pseudo Second-Order Ki-<br>netics |                                                   | Intra-Particle Diffusion Kinetics |                                                     |
|-------------|-----------------------------|---------------------------------------------------|---------------------|-----------------------------------|---------------------------------------------------|-----------------------------------|-----------------------------------------------------|
|             | $q_e$<br>(mg/g)             | $K_1$<br>(mg.g <sup>-1</sup> .min <sup>-1</sup> ) | 8.524               | $q_e$<br>(mg/g)                   | $K_2$<br>(g.mg <sup>-1</sup> .min <sup>-1</sup> ) | C<br>(mg/g)                       | $K_p$<br>(mg.g <sup>-1</sup> .min <sup>-0.5</sup> ) |
| Cell-D      | 1.764                       | $7.83 \times 10^{-3}$                             | 8.773               | 8.849                             | 0.224                                             | 7.8276                            | 0.1483                                              |
| Cel-X       | 2.016                       | $8.98 \times 10^{-3}$                             | 8.745               | 8.834                             | 0.1396                                            | 7.5422                            | 0.1746                                              |

**Table S3.** Thermodynamic parameters of Difenoconazole pesticide adsorption by Cell-X or Cell-D.

| Nanopolymer | $\Delta H$ (kJ) | $\Delta G^\circ$ (kJ) | $\Delta S$ (J/K) |
|-------------|-----------------|-----------------------|------------------|
| Cell-D      | -25.442         | -5.312                | -68.667          |
| Cell-X      | -24.554         | -4.013                | -70.071          |
